# Supplementary material for: Maize ABP9 enhances tolerance to multiple stresses in transgenic Arabidopsis by modulating ABA signaling and cellular levels of reactive oxygen species
Source: PubMed Central journal article supplement — Plant Mol Biol. 2011 Feb 17;75(4):365–78. doi: 10.1007/s11103-011-9732-x (PMC3044229; doi:10.1007/s11103-011-9732-x), 2011-02-17
Supplement: 11103_2011_9732_MOESM6_ESM.pdf [file 11103_2011_9732_MOESM6_ESM.pdf]

---

**Supplemental Table S5. Primers of 20 selected genes for qRT-PCR**

---

| <b>Locus</b> | <b>Gene</b>        | <b>Primer Sequences (5' to 3')</b>                        |
|--------------|--------------------|-----------------------------------------------------------|
| AT1g08830    | <i>CSD1</i>        | F: gaactgccaccttcacaatca<br>R: gaactgccaccttcacaatca      |
| AT2g28190    | <i>CSD2</i>        | F: ggaccacattcaaccctaaca<br>R: ccatcgccattggcattt         |
| AT1g20620    | <i>CAT3</i>        | F: gtcacccatgacatttcaaacc<br>R: acggtggagaaacggacaat;     |
| AT3g01190    | <i>PER27</i>       | F: cgcaatggttgacttga<br>R: tgagcgaaaatcgctgataa           |
| AT5g62520    | <i>SRO5</i>        | F: ggatggcatttctgtattga<br>R: ggattagttcgctccgtgtaa       |
| AT1g27730    | <i>ZAT10</i>       | F: agcactggacaaagggttaagc<br>R: gcgagaagcatgaggcaaa       |
| AT5g59280    | <i>ZAT12</i>       | F: gagtcaagaagcctaacaacg<br>R: atcggaaactcactccacat       |
| AT2g42540    | <i>COR15A</i>      | F: gcgatgtggaggagaa<br>R: aggtaagaccctactttgtg            |
| AT5g52300    | <i>RD29B</i>       | F: gacatggtgaggcggttgc<br>R: aacggtggtgccaagtgat          |
| AT5g15960    | <i>KIN1</i>        | F: cctccaagccggtcaga<br>R: actcttcccgcctgtgtg             |
| AT1g64110    | <i>AIA1</i>        | F: ctgctactaatcggcctttcg<br>R: actttctcctcgccaacaat       |
| AT2g18050    | <i>HIS1-3</i>      | F: tccggcggcgaagaa<br>R: ggaccatcaaagcctctttatca          |
| At4G25490    | <i>CBF1</i>        | F: ggaacagagcgaagggtcgcg-3'<br>R: agacggcggcggtaaaa-3'    |
| At4g25470    | <i>CBF2</i>        | F: aaccagcgggaaggaagaagt-3'<br>R: ttccttggcacagggtgatt-3' |
| AT3g19580    | <i>AZF2</i>        | F: ccatcgtcgcggagaaa<br>R: gcttgaccctcggaaca              |
| AT5g43840    | <i>HSFA6A</i>      | F: aaggaatcaagaatcgagagcaa<br>R: ccataatcaaacacactccacat  |
| AT5g59220    | <i>PP2C (HAI1)</i> | F: atcctccgatcataagccagac<br>R: gggccatcccagtagataaacac   |
| AT2g47190    | <i>MYB2</i>        | F: ttgatgccgagattagtg<br>R: ggttgactgggtcgggtga           |
| AT5g49620    | <i>MYB78</i>       | F: gcgtccatcgggtctgt<br>R: ttatccacgttgtgtgtg             |
| At3g18780    | <i>Actin2</i>      | F: ccaacagagagaagatgact<br>R: atgtcttacaattcccg           |

---

F=forward; R=reverse

---
