# Supplementary material for: Maize ABP9 enhances tolerance to multiple stresses in transgenic Arabidopsis by modulating ABA signaling and cellular levels of reactive oxygen species
Source: PubMed Central journal article supplement — Plant Mol Biol. 2011 Feb 17;75(4):365–78. doi: 10.1007/s11103-011-9732-x (PMC3044229; doi:10.1007/s11103-011-9732-x), 2011-02-17
Supplement: 11103_2011_9732_MOESM7_ESM.pdf [file 11103_2011_9732_MOESM7_ESM.pdf]

**Supplemental Table S6. ACGT-containing ABREs in a 2000-bp promoter region upstream of the start codon of *ABP9*-regulated genes**

| Inducibility <sup>a</sup> | Gene               | Description <sup>b</sup>                       | AGI Code <sup>c</sup> | ABRE Sequence <sup>d</sup> | Position from start |       | Strand | Reference                                                                                          |
|---------------------------|--------------------|------------------------------------------------|-----------------------|----------------------------|---------------------|-------|--------|----------------------------------------------------------------------------------------------------|
|                           |                    |                                                |                       |                            | start               | end   |        |                                                                                                    |
| - S - - O -               | <i>CSD1</i>        | Cytosolic copper/zinc superoxide dismutase     | AT1g08830             | ACGTGGC                    | -693                | -687  | "+"    | (Kliebenstein et al. 1998; Jagadeeswaran et al. 2009)                                              |
|                           |                    |                                                |                       | TACGTG                     | -649                | -654  | "-"    |                                                                                                    |
| - - - - O -               | <i>CSD2</i>        | Chloroplastic copper/zinc superoxide dismutase | AT2g28190             |                            |                     |       |        | (Abdel-Ghany et al. 2005; Sunkar et al. 2006)                                                      |
| - - - - O -               | <i>CAT3</i>        | Catalase3                                      | AT1g20620             | CACGTG                     | -1608               | -1603 | "+"    | (Kandlbinder et al. 2004.)                                                                         |
| - - - - -                 | <i>PER27</i>       | Peroxidase 27                                  | AT3g01190             |                            |                     |       |        |                                                                                                    |
| - S - - O -               | <i>SRO5</i>        | similarity to RCD1 but without the WWE domain  | AT5g62520             | TACGTG                     | -534                | -529  | "+"    | (Borsani et al. 2005)                                                                              |
| D S A C O -               | <i>ZAT10</i>       | Cys2/His2-type zinc-finger protein             | AT1g27730             | CACGTG                     | -329                | -324  | "+"    | (Sakamoto et al. 2004; Rossel et al. 2007; Lippuner et al. 1996)                                   |
|                           |                    |                                                |                       | TACGTG                     | -1831               | -1826 | "+"    |                                                                                                    |
| - S A C O -               | <i>ZAT12</i>       | Zinc finger protein                            | At5g59820             |                            |                     |       |        | (Davletova et al. 2005; Vogel et al. 2005)                                                         |
| D S A C - -               | <i>COR15A</i>      | Late embryogenesis-abundant protein            | AT2g42540             | CACGTG                     | -252                | -247  | "+"    | (Xiong et al. 2002; Vergnolle et al. 2005)                                                         |
|                           |                    |                                                |                       | CACGTG                     | -428                | -423  | "+"    |                                                                                                    |
|                           |                    |                                                |                       | TACGTG                     | -191                | -186  | "+"    |                                                                                                    |
|                           |                    |                                                |                       | ACGTGGC                    | -251                | -245  | "+"    |                                                                                                    |
| D S A C - -               | <i>RD29B</i>       | Hydrophilic protein                            | AT5g52300             | TACGTG                     | -704                | -699  | "+"    | (Nordin et al. 1993; Yamaguchi-Shinozaki and Shinozaki, 1993; Nakashima et al. 2006)               |
|                           |                    |                                                |                       | TACGTG                     | -195                | -190  | "+"    |                                                                                                    |
|                           |                    |                                                |                       | ACGTGGC                    | -241                | -247  | "-"    |                                                                                                    |
|                           |                    |                                                |                       | ACGTGGC                    | -222                | -216  | "+"    |                                                                                                    |
|                           |                    |                                                |                       | TACGTG                     | -240                | -245  | "-"    |                                                                                                    |
| D S A C - -               | <i>KIN1</i>        | Late embryogenesis-abundant protein            | AT5g15960             | TACGTG                     | -1532               | -1527 | "+"    | (Wang et al. 1995; Xiong et al. 2002; Vergnolle et al. 2005)                                       |
|                           |                    |                                                |                       | CACGTG                     | -138                | -133  | "+"    |                                                                                                    |
|                           |                    |                                                |                       | CACGTG                     | -211                | -206  | "+"    |                                                                                                    |
|                           |                    |                                                |                       | TACGTG                     | -1187               | -1192 | "-"    |                                                                                                    |
| D S A - - -               | <i>AIA1</i>        | AAA family ATPase                              | AT1g64110             | TACGTG                     | -933                | -928  | "+"    | (Fujita et al. 2005)                                                                               |
|                           |                    |                                                |                       | TACGTG                     | -554                | -559  | "-"    |                                                                                                    |
| D - A - - -               | <i>HIS1-3</i>      | Linker histone H1                              | AT2g18050             | CACGTG                     | -171                | -166  | "+"    | (Fujita et al. 2005; Huang et al. 2008)                                                            |
|                           |                    |                                                |                       | TACGTG                     | -137                | -142  | "-"    |                                                                                                    |
| - - A C - -               | <i>CBF1</i>        | DRE/CRT-binding transcription factor           | At4g25490             | CACGTG                     | -275                | -270  | "+"    | (Shinwari et al. 1998; Knight et al. 2004)                                                         |
|                           |                    |                                                |                       | CACGTG                     | -1431               | -1426 | "+"    |                                                                                                    |
| - - A C - -               | <i>CBF2</i>        | DRE/CRT-binding transcription factor           | At4g25470             | ACGTGGC                    | -1943               | -1937 | "+"    | (Medina et al. 1999; Knight et al. 2004)                                                           |
|                           |                    |                                                |                       | ACGTGGC                    | -250                | -244  | "+"    |                                                                                                    |
|                           |                    |                                                |                       | TACGTG                     | -1944               | -1939 | "+"    |                                                                                                    |
|                           |                    |                                                |                       | CACGTG                     | -251                | -246  | "+"    |                                                                                                    |
|                           |                    |                                                |                       | CACGTG                     | -1277               | -1272 | "+"    |                                                                                                    |
| D S A - - -               | <i>AZF2</i>        | Zinc finger protein                            | AT3g19580             | CACGTG                     | -1277               | -1272 | "+"    | (Sakamoto et al. 2000)                                                                             |
|                           |                    |                                                |                       | CACGTG                     | -1251               | -1246 | "+"    |                                                                                                    |
|                           |                    |                                                |                       | CACGTG                     | -1144               | -1139 | "+"    |                                                                                                    |
|                           |                    |                                                |                       | CACGTG                     | -166                | -161  | "+"    |                                                                                                    |
|                           |                    |                                                |                       | ACGTGGC                    | -1247               | -1253 | "-"    |                                                                                                    |
| D S A C O H               | <i>HSPA6A</i>      | Heat shock transcription factor family protein | AT5g43840             | ACGTGGC                    | -162                | -168  | "-"    | (Rizhsky et al. 2004; Miller and Mitter, 2006; von Koskull-Döing et al. 2007; Yoshida et al. 2010) |
|                           |                    |                                                |                       | ACGTGGC                    | -162                | -168  | "-"    |                                                                                                    |
| D - A - - H               | <i>PP2C (HAI1)</i> | Protein phosphatase 2C                         | AT5g59220             | CACGTG                     | -1865               | -1860 | "+"    | (Xin et al., 2005; Huang et al., 2008; Rizhsky et al., 2004)                                       |
| CACGTG                    | -321               | -316                                           | "+"                   |                            |                     |       |        |                                                                                                    |
| TACGTG                    | -359               | -364                                           | "-"                   |                            |                     |       |        |                                                                                                    |
| D S A - - -               | <i>ATMYB2</i>      | MYB transcription factor                       | AT2g47190             |                            |                     |       |        | (Urao et al. 1993; Xin et al. 2005)                                                                |
| - S A - - -               | <i>ATMYB78</i>     | R2R3 factor gene family                        | AT5g49620             |                            |                     |       |        | (Xin et al. 2005; Yanhui et al. 2006)                                                              |

<sup>a</sup>Data on inducibility were based on published data listed in Reference. D, drought; S, high salinity; A, ABA; C, cold; H, heat; O, oxidative stress caused by light, metal, etc.

<sup>b</sup>Description as given by the The Arabidopsis Information Resource and Munich Information Center for Protein Sequences.

<sup>c</sup>AGI, Arabidopsis Genome Initiative.

<sup>d</sup>ACGT-containing ABRE Core Sequence in 2000-bp upstream of the first translation start codon.

Supplemental references:

- Abdel-Ghany SE, Muller-Moule P, Niyogi KK, Pilon M, Shikanai T (2005) Two P-type ATPases are required for copper delivery in *Arabidopsis thaliana* chloroplasts. *Plant Cell* 17:1233-1251.
- Borsani O, Zhu J, Verslues PE, Sunkar R, Zhu J-K (2005) Endogenous siRNAs derived from a pair of natural cis-antisense transcripts regulate salt tolerance in *Arabidopsis*. *Cell* 123:1279-1291.
- Davletova S, Schlauch K, Coutu J, Mittler R (2005) The zinc-finger protein Zat12 plays a central role in reactive oxygen and abiotic stress signaling in *Arabidopsis*. *Plant Physiol* 139:847-856.
- Fujita Y, Fujita M, Satoh R, Maruyama K, Parvez MM, Seki M, Hiratsu K, Ohme-Takagi M, Shinozaki K, Yamaguchi-Shinozaki K (2005) AREB1 is a transcription activator of novel ABRE-dependent ABA signaling that enhances drought stress tolerance in *Arabidopsis*. *Plant Cell* 17:3470-3488.
- Huang D, Wu W, Abrams SR, Cutler AJ (2008) The relationship of drought-related gene expression in *Arabidopsis thaliana* to hormonal and environmental factors. *J Exp Bot* 59:2991-3007.
- Jagadeeswaran G, Saini A, Sunkar R (2009) Biotic and abiotic stress down-regulate miR398 expression in *Arabidopsis*. *Planta* 229:1009-1014.
- Kandlbinder A, Finkemeier I, Wormuth D, Hanitzsch M, Dietz K-J (2004) The antioxidant status of photosynthesizing leaves under nutrient deficiency: redox regulation, gene expression and antioxidant activity in *Arabidopsis thaliana*. *Physiol Plant* 120:63-73.
- Kliebenstein DJ, Monde R-A, Last RL (1998) Superoxide dismutase in *Arabidopsis*: an eclectic enzyme family with disparate regulation and protein localization. *Plant Physiol* 118:637-650.
- Knight H, Zarka DG, Okamoto H, Thomashow MF, Knight MR (2004) Abscisic acid induces *CBF* gene transcription and subsequent induction of cold-regulated genes via the CRT promoter element. *Plant Physiol* 135:1710-1717.
- Lippuner V, Cyert MS, Gasser CS (1996) Two classes of plant cDNA clones differentially complement yeast calcineurin mutants and increase salt tolerance of wild-type yeast. *J Biol Chem* 271:12859-12866.
- Medina J, Bagues M, Terol J, Perez-Alonso M, Salinas J (1999) The *Arabidopsis CBF* gene family is composed of three genes encoding AP2 domain-containing proteins whose expression is regulated by low temperature but not by abscisic acid or dehydration. *Plant Physiol* 119:463-470.
- Miller G, Mittler R (2006) Could heat shock transcription factors function as hydrogen peroxide sensors in plants? *Ann Bot* 9:279-288.
- Nakashima K, Fujita Y, Katsura K, Maruyama K, Narusaka Y, Seki M, Shinozaki K, Yamaguchi-Shinozaki K (2006) Transcriptional regulation of ABI3- and ABA-responsive genes including *RD29B* and *RD29A* in seeds, germinating embryos, and seedlings of *Arabidopsis*. *Plant Mol Biol* 60:51-68.
- Nordin K, Vahala T, Palva ET (1993) Differential expression of two related, low-temperature-induced genes in *Arabidopsis thaliana* (L.) Heynh. *Plant Mol Biol* 21:641-653.
- Rizhsky L, Liang H, Shuman J, Shulaev V, Davletova S, Mittler R (2004) When defense pathways collide. the response of *Arabidopsis* to a combination of drought and heat stress. *Plant Physiol* 134:1683-1696.
- Rossel JB, Wilson PB, Hussain D, Woo NS, Gordon MJ, Mewett OP, Howell KA, Whelan J, Kazan K, Pogson BJ (2007) Systemic and intracellular responses to photooxidative stress in *Arabidopsis*. *Plant Cell* 19:4091-4110.
- Sakamoto H, Araki T, Meshi T, Iwabuchi M (2000) Expression of a subset of the Arabidopsis Cys2/His2-type zinc-finger protein gene family under water stress. *Gene* 248:23-32.
- Sakamoto H, Maruyama K, Sakuma Y, Meshi T, Iwabuchi M, Shinozaki K, Yamaguchi-Shinozaki K (2004) *Arabidopsis* Cys<sub>2</sub>/His<sub>2</sub>-Type zinc-finger proteins function as transcription repressors under drought, cold, and high-salinity stress conditions. *Plant Physiol* 136:2734-2746.
- Shinwari ZK, Nakashima K, Miura S, Kasuga M, Seki M, Yamaguchi-Shinozaki K, Shinozaki K (1998) An *Arabidopsis* gene family encoding DRE/CRT binding proteins involved in low-temperature-responsive gene expression. *Biochem Biophys Res Commun*. 250:161-170.
- Sunkar R, Kapoor A, Zhu J-K (2006) Posttranscriptional Induction of Two Cu/Zn Superoxide Dismutase Genes in *Arabidopsis* Is Mediated by Downregulation of miR398 and Important for Oxidative Stress Tolerance. *Plant Cell* 18:2051-2065.
- Urao T, Yamaguchi-Shinozaki K, Urao S, Shinozaki K (1993) An *Arabidopsis* myb homolog is induced by dehydration stress and its gene product binds to the conserved MYB recognition sequence. *Plant Cell* 5:1529-1539.
- Vergnolle C, Vaultier M-N, Taconnat L, Renou J-P, Kader J-C, Zachowski A, Ruelland E (2005) The cold-induced early activation of phospholipase C and D pathways determines the response of two distinct clusters of genes in *Arabidopsis* Cell Suspensions. *Plant Physiol* 139:1217-1233.
- Vogel JT, Zarka DG, Van Buskirk HA, Fowler SG, Thomashow MF (2005) Roles of the CBF2 and ZAT12 transcription factors in configuring the low temperature transcriptome of *Arabidopsis*. *Plant J* 41:195-211.
- von Koskull-Döing P, Scharf K-D, Nover L (2007) The diversity of plant heat stress transcription factors. *Trends Plant Sci* 12:452-457.
- Wang H, Datla R, Georges F, Loewen M, Cutler AJ (1995) Promoters from *kin1* and *cor6.6*, two homologous *Arabidopsis thaliana* genes: transcriptional regulation and gene expression induced by low temperature, ABA, osmoticum and dehydration. *Plant Mol Biol* 28:605-617.
- Xin Z, Zhao Y, Zheng Z-L (2005) Transcriptome analysis reveals specific modulation of abscisic acid signaling by ROP10 small GTPase in *Arabidopsis*. *Plant Physiol* 139:1350-1365.
- Xiong L, Lee H, Ishitani M, Zhu J-K (2002) Regulation of osmotic stress-responsive gene expression by the *LOS6/ABA1* locus in *Arabidopsis*. *J Biol Chem* 277:8588-8596.
- Yamaguchi-Shinozaki K, Shinozaki K (1993) Characterization of the expression of a desiccation-responsive *rd29* gene of *Arabidopsis thaliana* and analysis of its promoter in transgenic plants. *Mol Gen Genet* 236:331-340.
- Yanhui C, Xiaoyuan Y, Kun H, Meihua L, Jigang L, Zhaofeng G, Zhiqiang L, Yunfei Z, Xiaoxiao W, Xiaoming Q, Yunping S, Li Z, Xiaohui D, Jingchu L, Xing-Wang D, Zhangliang C, Hongya G, Li-Jia Q (2006) The MYB Transcription Factor Superfamily of Arabidopsis: Expression Analysis and Phylogenetic Comparison with the Rice MYB Family. *Plant Molecular Biology* 60:107-124.
- Yoshida T, Fujita Y, Hiroko S, Kidokoro S, Maruyama K, Mizoi J, Shinozaki K, Yamaguchi-Shinozaki K (2010) AREB1, AREB2, and ABF3 are master transcription factors that cooperatively regulate ABRE-dependent ABA signaling involved in drought stress tolerance and require ABA for full activation. *Plant J* 61:672-685.
